# Supplementary material
Source: HighWire-hosted journal article supplement (https://jnm.snmjournals.org/highwire/filestream/94792/field_highwire_adjunct_files/0/153494_Supplemental_Data.pdf)
Supplement: 153494_Supplemental_Data.pdf [file 153494_Supplemental_Data.pdf]

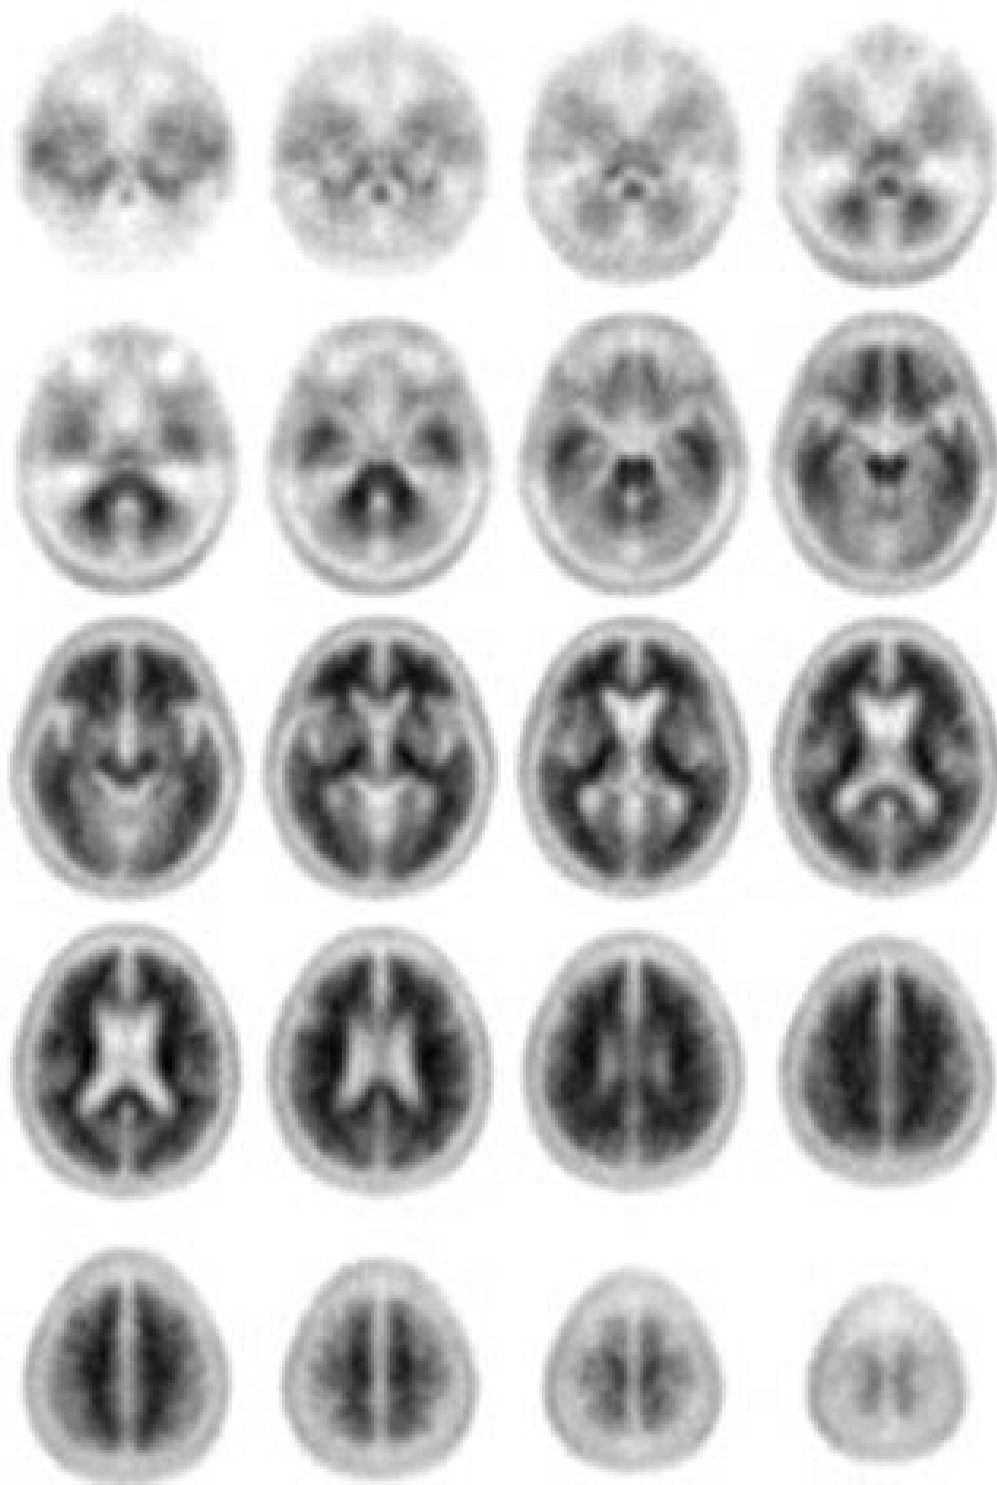

**Supplemental Figure 1.**  $^{18}\text{F}$ -Florbetapir PET template in MNI brain atlas space created by averaging PET images from clinically diagnosed AD ( $n = 11$ ) and cognitively normal ( $n = 15$ ) subjects.

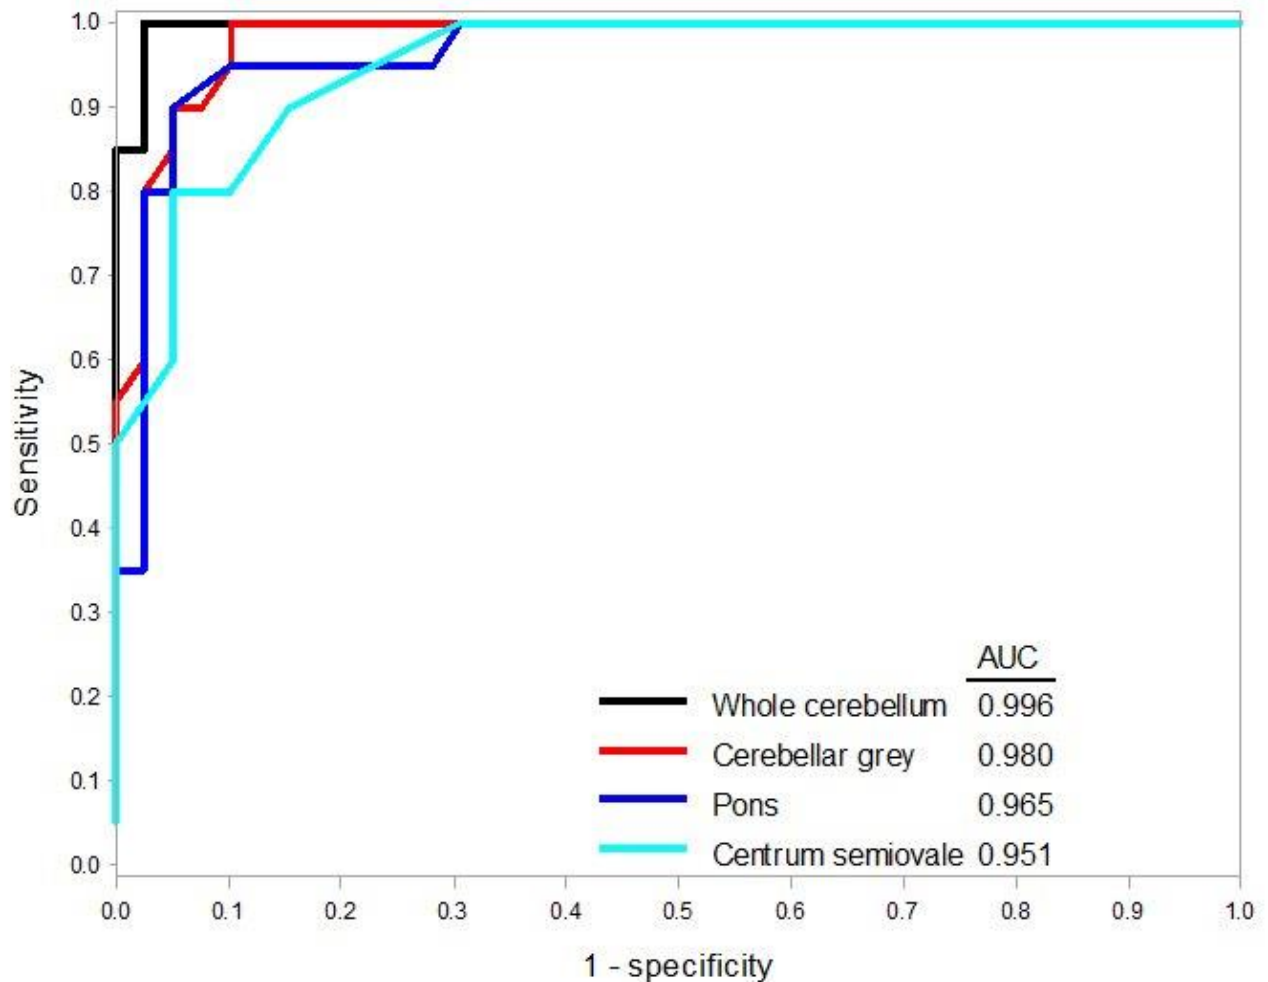

**Supplemental Figure 2.** Receiver-operating-characteristic curves showing pathology-positive and -negative discrimination based on AUCs in subjects, where mcSUVrs were calculated using 4 different reference regions (whole cerebellum, cerebellar gray, pons, and centrum semiovale).

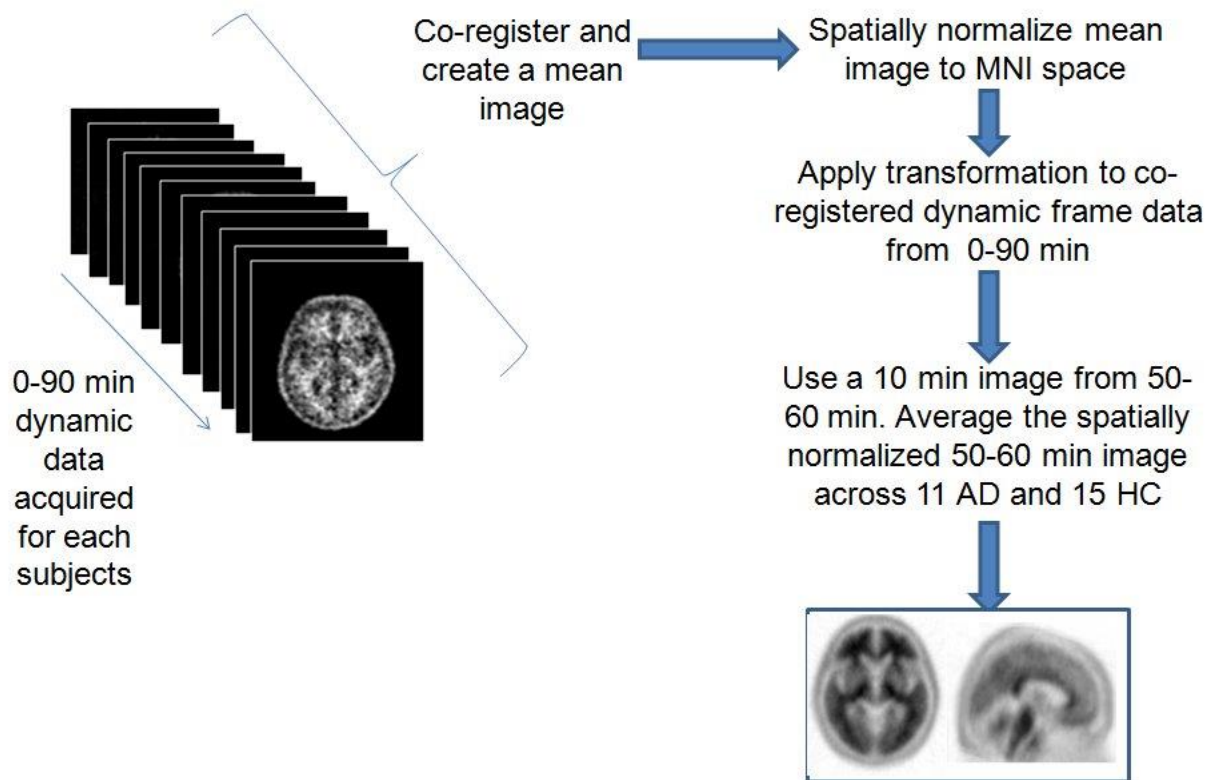

**Supplemental Figure 3.** Creation of standard  $^{18}\text{F}$ -florbetapir PET template in MNI space using the 10-min image at 50 min after injection from 15 HC and 11 AD subjects.
